# Supplementary material for: Patton's Bulldog: The Life and Service of General Walton H. Walker. (Book Reviews)
Source: Royal Society of Chemistry journal article supplement (doi:10.1039/c3nr33824j), 2003-06-22
Supplement: c3nr33824j.pdf [file c3nr33824j.pdf]

## Supporting Information

# Large-scale quantification of CVD graphene surface coverage

**Adriano Ambrosi,<sup>a</sup> Alessandra Bonanni,<sup>a</sup> Zdeněk Sofer<sup>b</sup> and Martin Pumera<sup>a\*</sup>**

<sup>a</sup> *Division of Chemistry & Biological Chemistry, School of Physical and Mathematical Sciences, Nanyang Technological University, Singapore 637371.*

<sup>b</sup> *Institute of Chemical Technology, Department of Inorganic Chemistry, 166 28 Prague 6, Czech Republic.*

\*Correspondence to: [pumera@ntu.edu.sg](mailto:pumera@ntu.edu.sg)

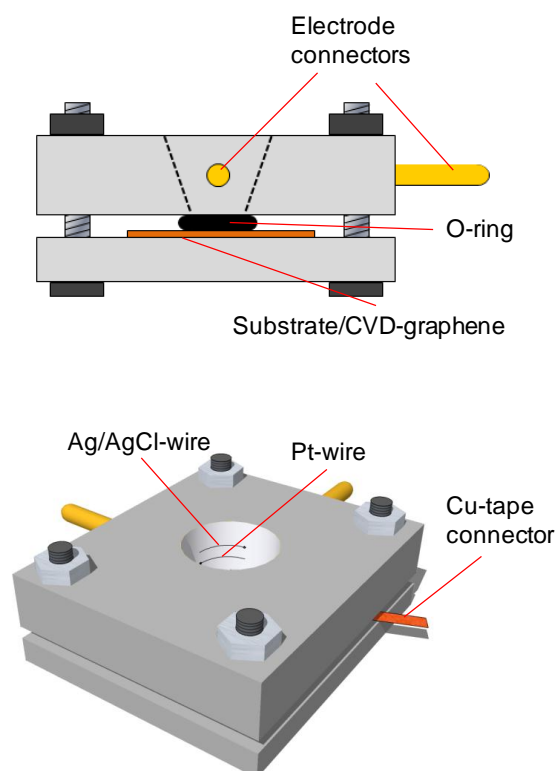

**Fig. S1.** Schematic of the electrochemical cell used for the measurements. It consists of a flat bottom part where the metal/CVD-graphene sample is placed; and an upper part having a conical hole which functions as reservoir. A rubber o-ring (I.D. = 4.5 mm; O.D. = 8.1 mm) and four screws ensure a secure and sealed chamber to be filled with the measurement solution for a total surface of 17 mm<sup>2</sup> for the CVD-Graphene sample to be examined. The metal/CVD-graphene acts as the working electrode while a Pt and Ag/AgCl wire immersed in the solution act as the auxiliary and the reference electrode, respectively. The size of the o-ring defines the portion of the CVD-graphene surface investigated. A Cu tape was used to ensure the electrical connection between the metal/CVD-graphene and the voltammetric instrument. Electrochemical treatment and measurements were performed using NaOH 0.1 M as background electrolyte. All electrochemical potentials in this paper are stated versus Ag/AgCl reference electrode.

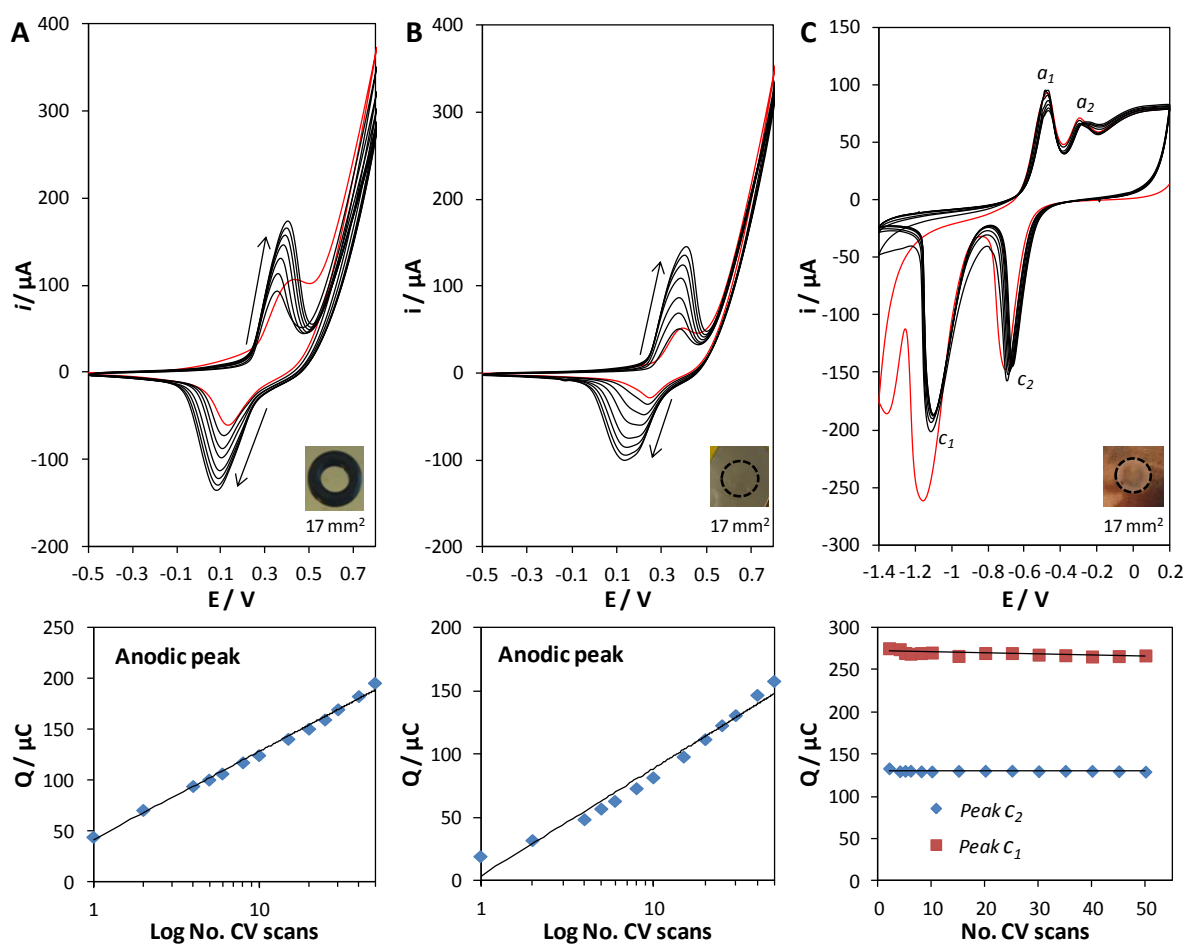

**Fig. S2.** Successive cyclic voltammograms of (A) bare Si/SiO<sub>2</sub>/Ni, (B) bare Ni foil and (C) bare Cu foil in 0.1 M NaOH. Plots of the charge ( $\mu\text{C}$ ) vs. the number of CV scans are presented in the lower part of the figure. The charge involved in the anodic oxidation of the Ni(OH)<sub>2</sub> to NiOOH (Fig. S2A and B) increases linearly with the natural logarithmic of the number of CV scans. On the contrary, the electrochemical signal recorded for Cu foil reaches a steady contour after a few CV scans.

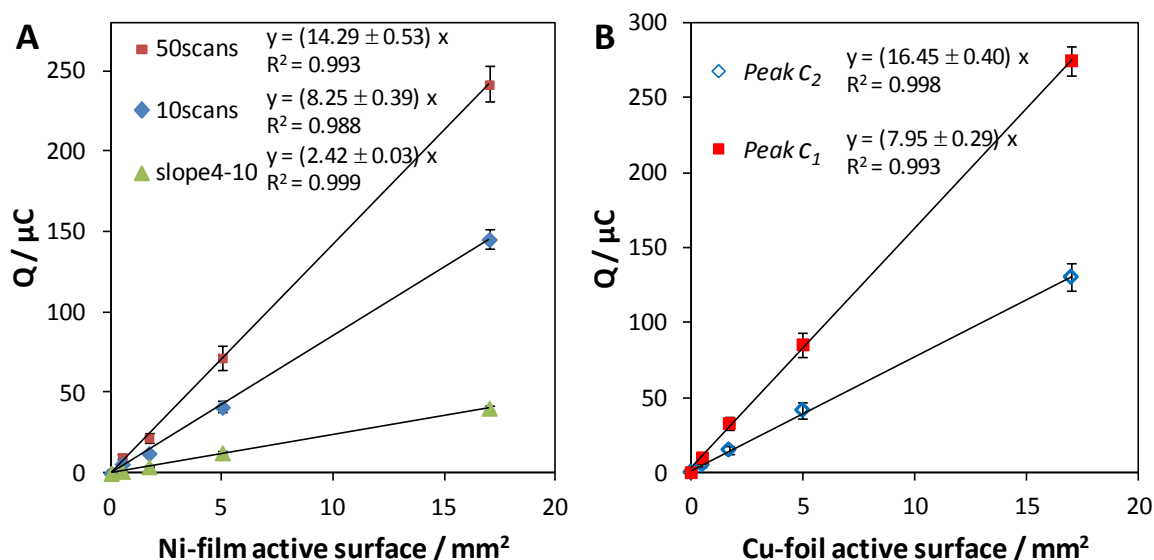

**Fig. S3.** (A) Different plots correlated to the Ni film active surface area. A linear relationship can be obtained taking into consideration the charge involved in the anodic oxidation of Ni(OH)<sub>2</sub> after 50 CV scans (red square) or after 10 CV scans (blue square). Considering the CV scans from 4 to 10, a linear regression between the charge and the Log of the number of scans (4-10) can be obtained. The slope of such linear regression is then linearly proportional with the active Ni metal surface (green triangle). (B) Plots correlated to the Cu active surface. A linear relationship can be obtained considering the charge involved in the cathodic reduction process C<sub>1</sub> (red square) or C<sub>2</sub> (blue square). It can be seen that in all cases a perfectly linear regression is generated, giving the opportunity to choose the most appropriate measurement method.

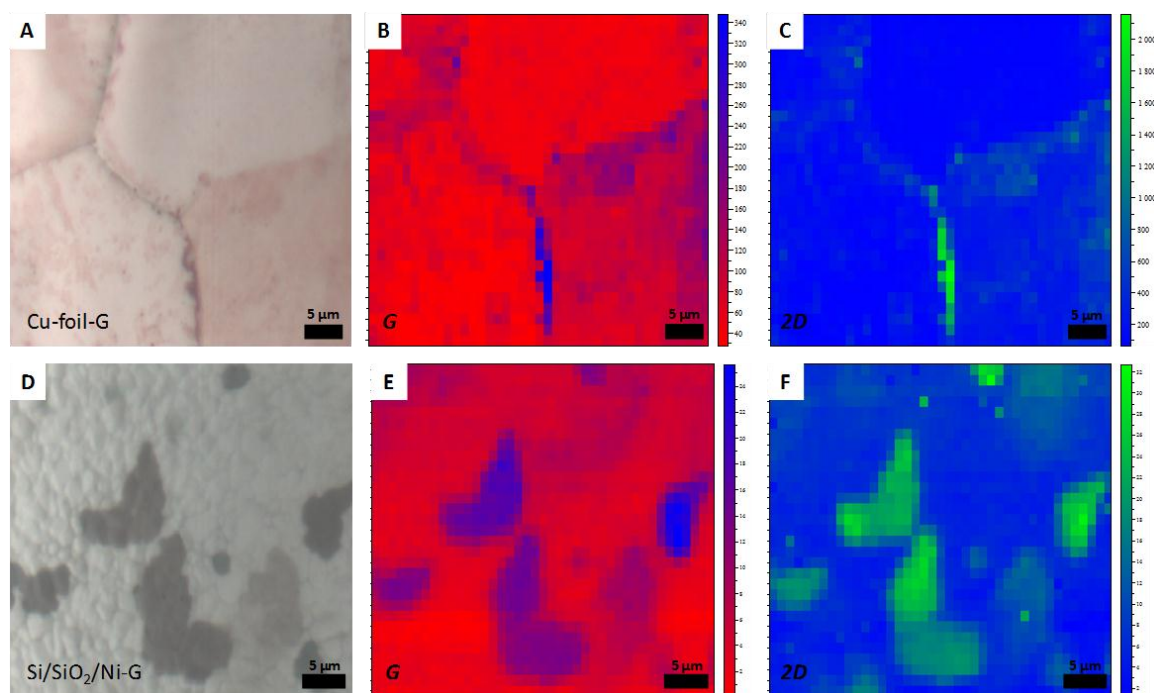

**Fig. S4.** Optical microscopy image of a region of Cu-Graphene sample (A) or Si/SiO<sub>2</sub>/Ni-Graphene sample (D) with the corresponding Raman maps generated according to the G band (1550-1650 cm<sup>-1</sup>) (B and E) or the 2D band (2650-2750 cm<sup>-1</sup>) (C and F). Laser: 514 nm, 100x objective, ~500 nm spot size.

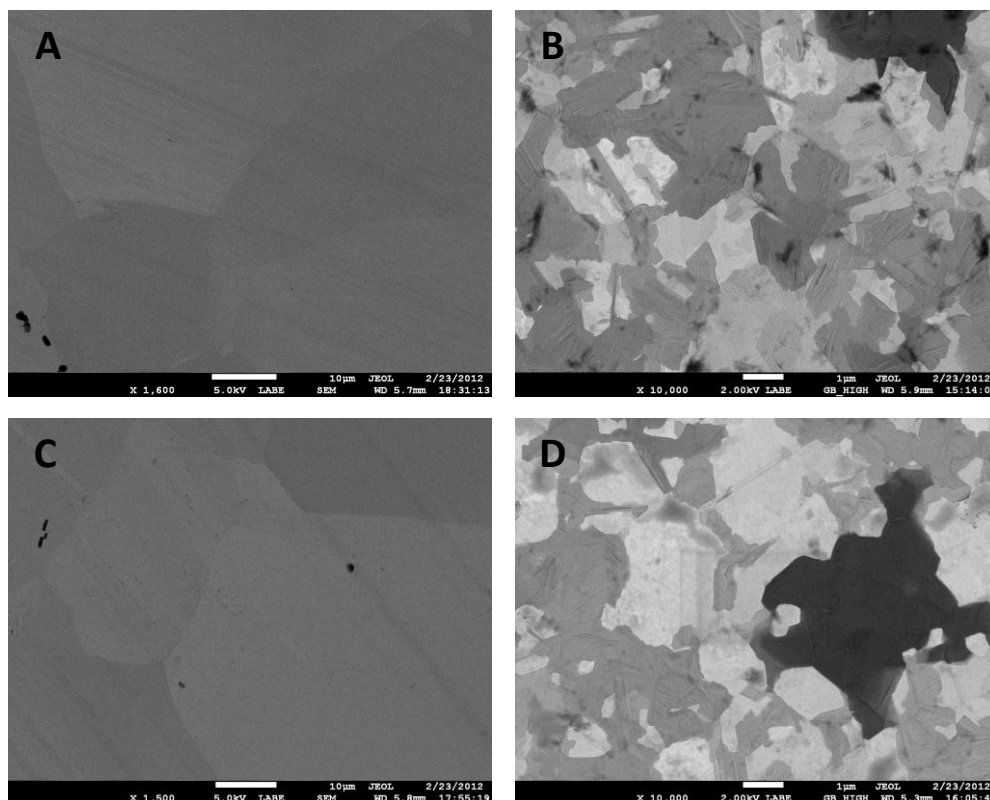

**Fig. S5.** Scanning electron microscopy images of Cu-Graphene sample as received (**A**) and after 10 cyclic voltammetric scans in NaOH (**C**). Si/SiO<sub>2</sub>/Ni-Graphene sample as received (**B**) and after 20 cyclic voltammetric scans in NaOH (**D**).

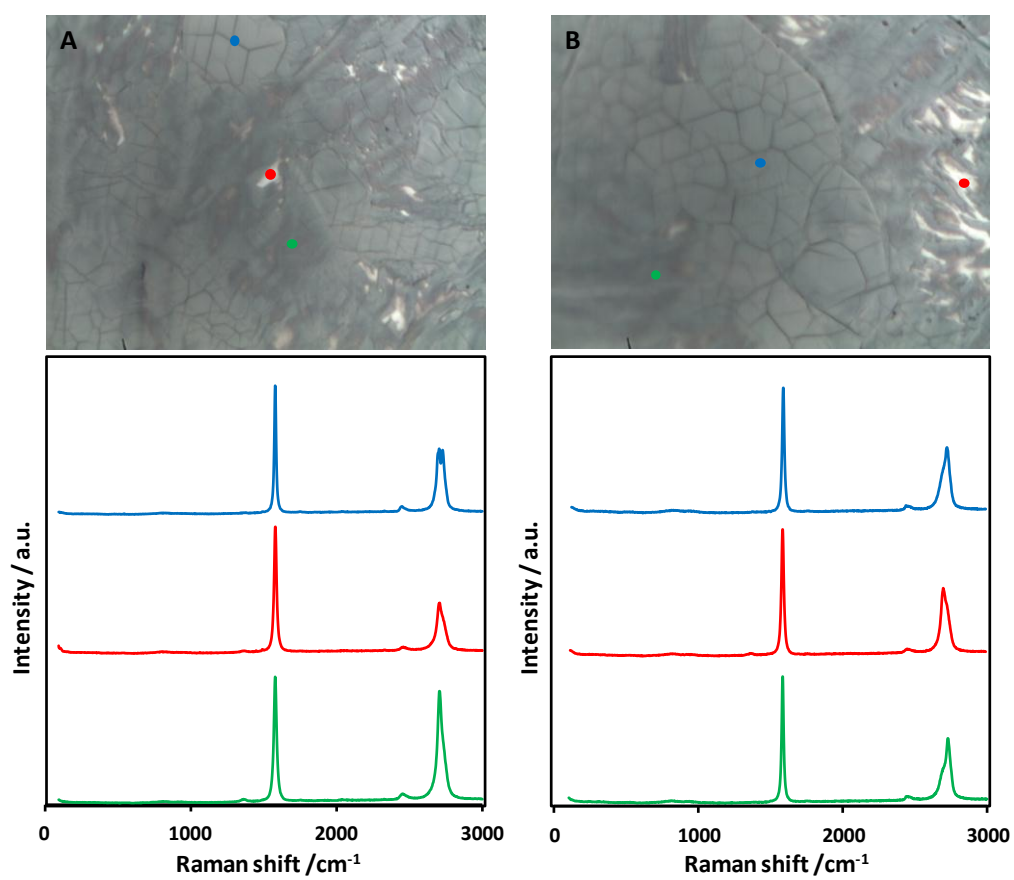

**Fig. S6.** Optical microscopy images and corresponding Raman spectra of Ni-foil-ML-Graphene samples as received (**A**) and after 50 cyclic voltammetric scans in NaOH (**B**).
